# Supplementary material for: Deposit feeding of a foraminifera from an Arctic methane seep site and possible association with a methanotroph revealed by transmission electron microscopy
Source: Copernicus journal article supplement (doi:10.5194/bg-2021-284), 2021-11-10
Supplement: Supplementary file 1 [file bg-2021-284-supplement.pdf]

## *SUPPLEMENTARY MATERIAL*

### **Deposit feeding of a foraminifera from an Arctic methane seep site and possible association with a methanotroph revealed by transmission electron microscopy**

Christiane Schmidt\*, Emmanuelle Geslin, Joan M Bernhard, Charlotte LeKieffre, Mette Marianne Svenning, Helene Roberge, Magali Schweizer, Giuliana Panieri

\*Corresponding author

E-mail: [christiane.schmidt@leibniz-zmt.de](mailto:christiane.schmidt@leibniz-zmt.de)

The copyright of individual parts of the supplement might differ from the CC BY 4.0 License

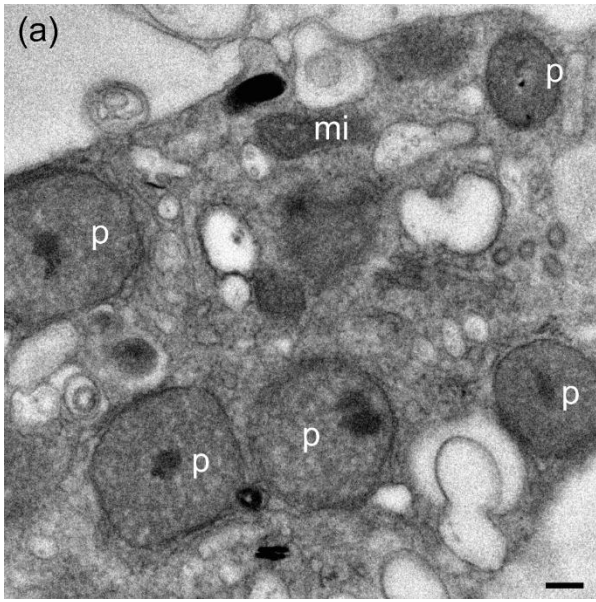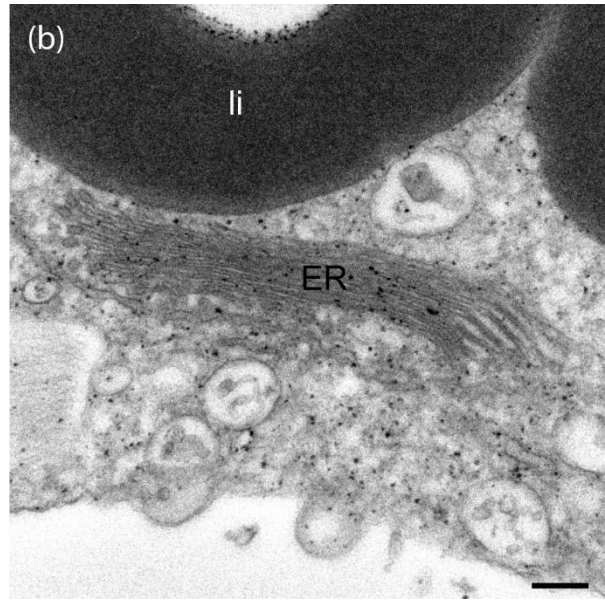

**Figure S1** Peroxisomes and endoplasmatic reticulum in *N. labradorica* from active methane emitting site (a) five peroxisomes (b) (c) endoplasmatic reticulum (ER) close to a lipid droplet, scale bar: 200 nm

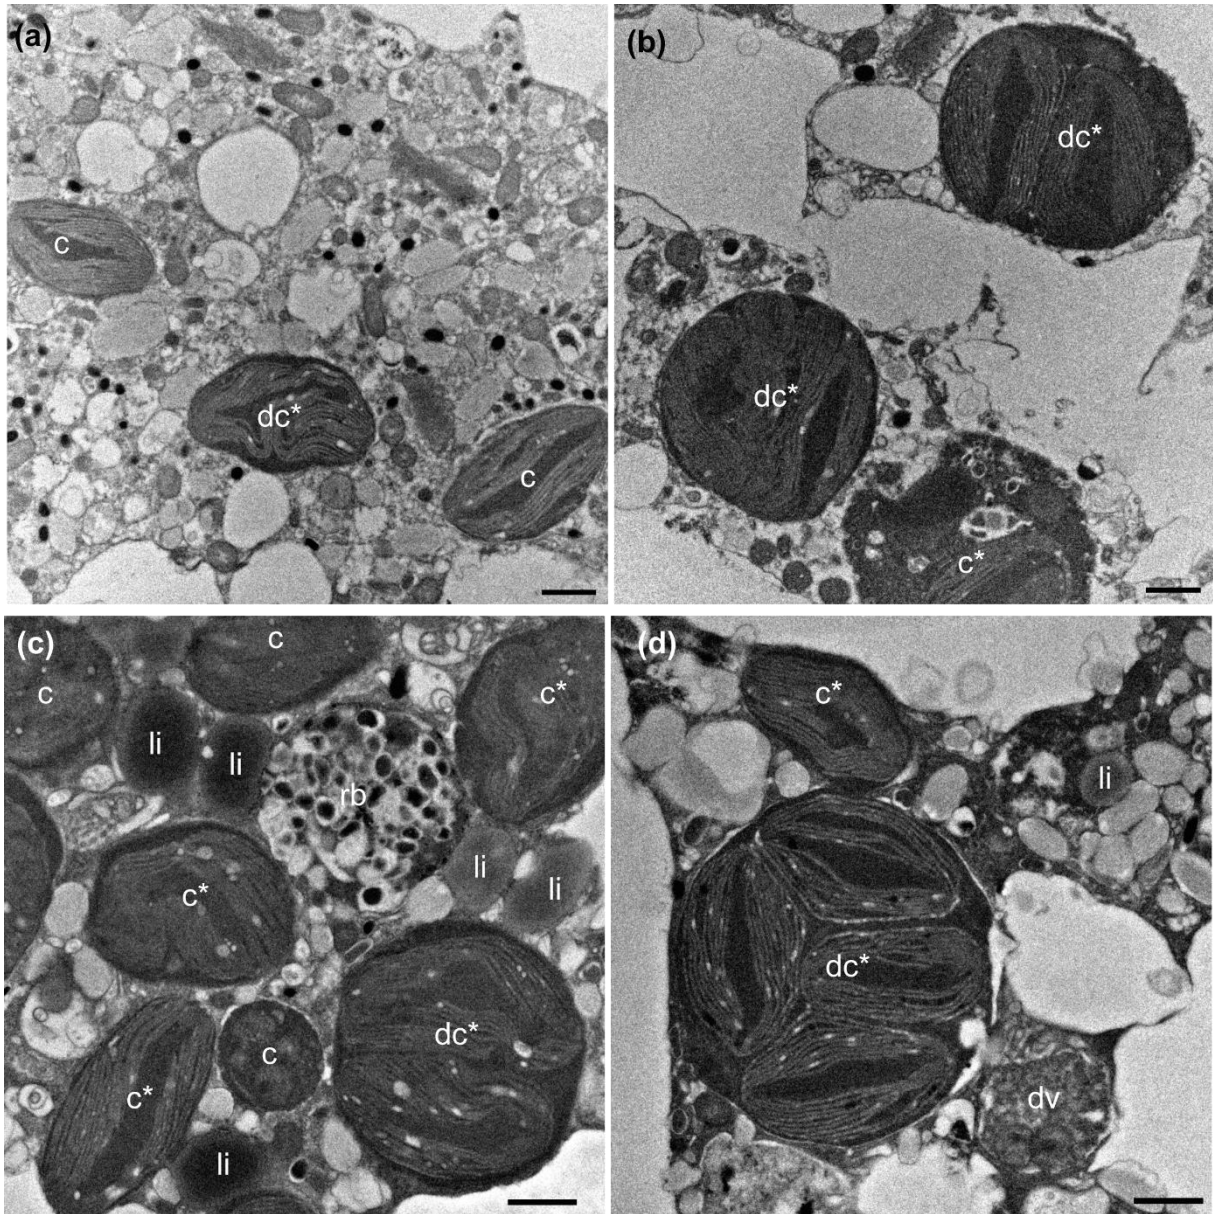

**Figure S2.** Kleptoplasts in *N. labradorica* from active methane emitting site (a-b). Degraded chloroplasts [marked with c\*] and degraded double chloroplast [dc\*] in comparison to intact chloroplasts, marked with [c], are characterized with undamaged pyrenoids and thylakoids, degraded chloroplasts [c\*] have peripheral degradation of the membranes (increasing number of white areas inside the membranes) (sample E5, not exposed to bacteria), (c-d). chloroplasts (samples E28 and E29, from 4-h incubation) c: intact chloroplast, c\*: degraded chloroplast, dc\*: degraded double chloroplast, li: lipid droplets, rb: residual body, dv: digestive vacuole. scale bar: 1μm

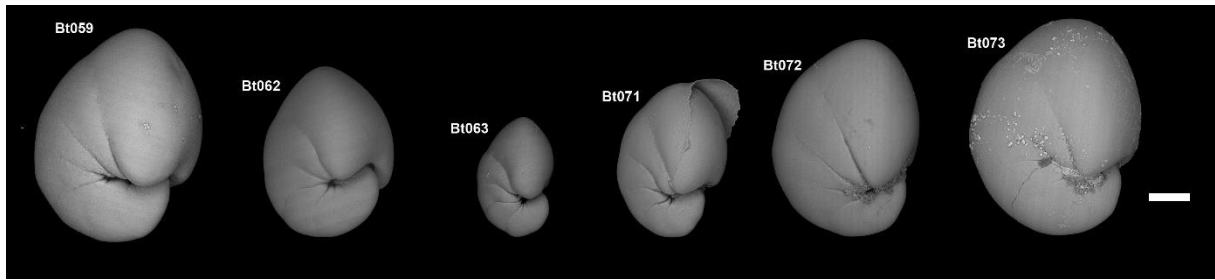

Figure S3. Scanning electron images of *N. labradorica* specimens extracted for DNA analysis. Identification numbers in bold indicate specimens positive for DNA amplification and sequencing. Scale bar 100  $\mu$ m.
